# Supplementary material
Source: PubMed Central journal article supplement (PMC4669849)
Supplement: NIHMS66122-supplement-01.pdf [file NIHMS66122-supplement-01.pdf]

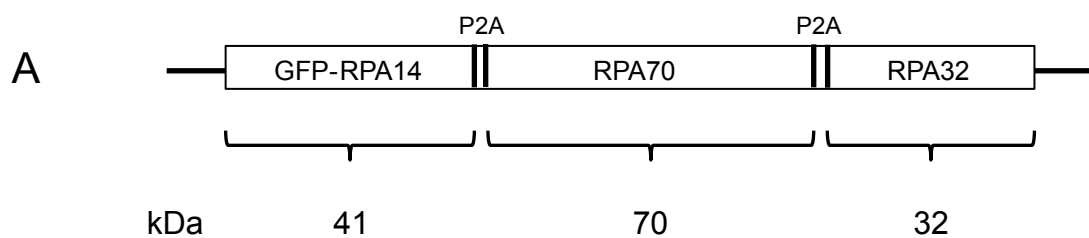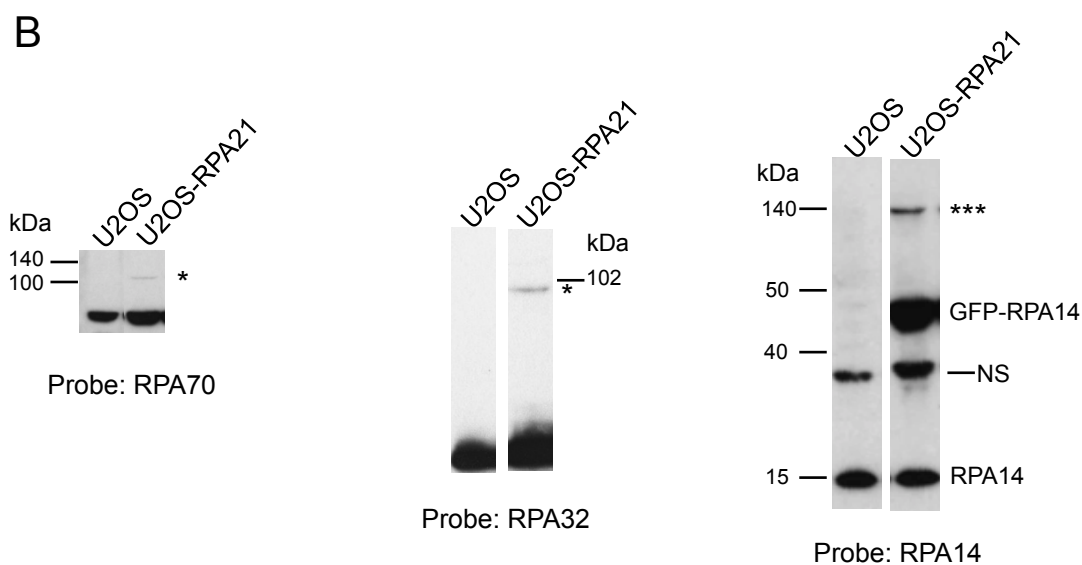

RPA in U2OS and overexpressing U2OS-RPA21 cells.

**A** RPA expression construct in U2OS-RPA21. The mRNA encodes all three RPA subunits translated as a single polypeptide in the order indicated. Individual subunits are linked by P2A sequences that permit processing into individual RPA proteins. RPA14 is also linked to GFP as indicated.

**B** Western blots of U2OS-RPA21 cell extracts reveal low levels of partially processed polypeptide. RPA32:70 fusion (\* left & centre panels); Full length unprocessed polypeptide (\*\*\*) right panel). The correctly processed GFP-RPA14 fusion and endogenous RPA14 are also shown. NS = non specific band

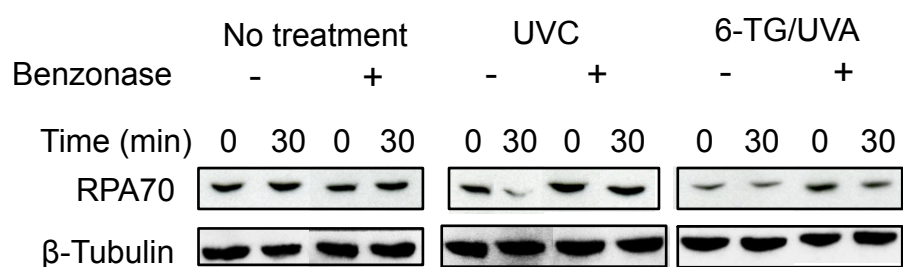

RPA70 becomes chromatin-associated after 6-TG/UVA treatment and is recovered by benzonase digestion.

U2OS cells grown for 24 h in 4  $\mu$ M 6-TG were irradiated with 20 kJ/m<sup>2</sup> UVA. Whole cell extracts prepared immediately or 30 min after irradiation were analysed by western blotting for RPA70 with (+) or without (-) chromatin digestion with benzonase.

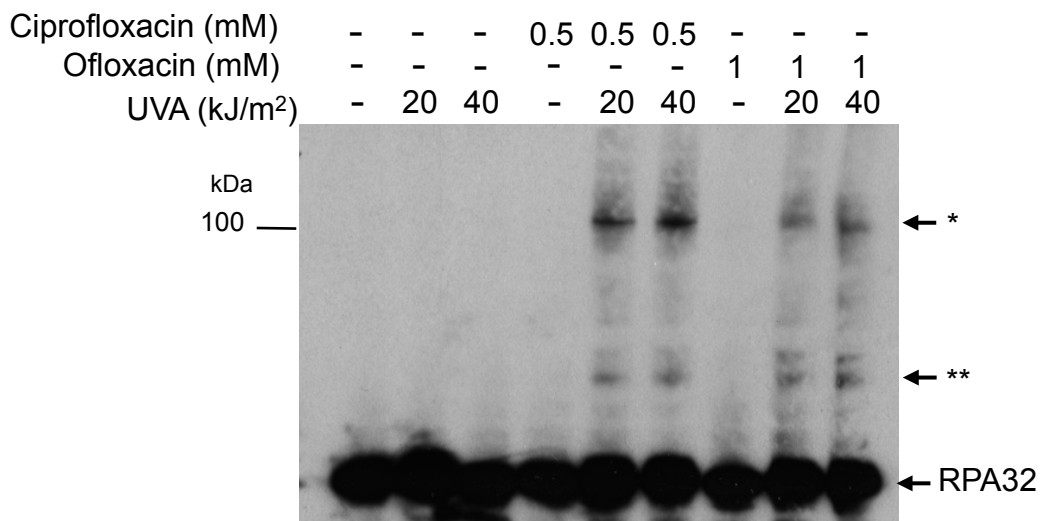

RPA32:RPA70 complex formation in normal human fibroblasts.

GM8339 untransformed human fibroblasts were treated for 1 h with ciprofloxacin or ofloxacin at the concentrations shown and UVA irradiated. Extracts prepared immediately after irradiation were analysed by western blotting.

The positions of RPA32 and the putative RPA32:70 (\*) and RPA32:14 (\*\*) complexes are indicated.

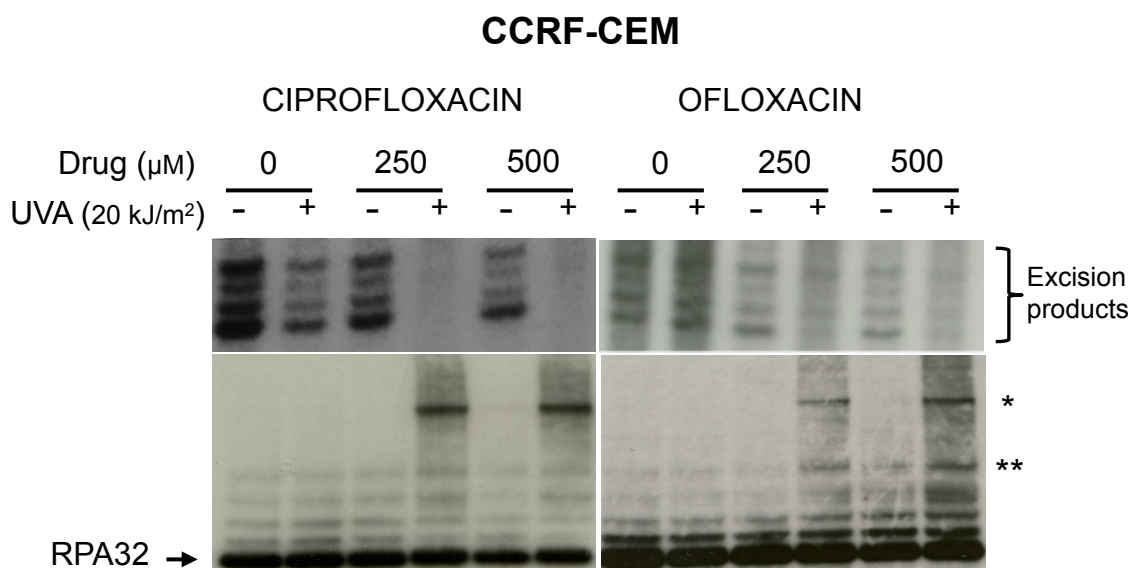

### RPA32 photoproducts and NER in CCRF-CEM nuclear extracts.

Upper panels: NER by extracts prepared from ciprofloxacin/UVA or ofloxacin/UVA-treated CCRF-CEM cells.

Repair capability was determined by analysing the formation of oligonucleotides generated during repair of a cisplatin intrastrand crosslink. These excision products (indicated) were radiolabelled and separated by PAGE.

The NER assays were reported in (Peacock et al. *Nucleic Acids Res.*, 42, 13714-13722)

Lower panels: Western blots of the same nuclear extracts were probed with antiRPA32. The position of the putative RPA32:70 (\*) and RPA32:14 (\*\*) photoproducts are indicated.
